# Supplementary material for: Genome-wide profiling of long non-coding RNA of the rice blast fungus Magnaporthe oryzae during infection
Source: BMC Genomics. 2022 Feb 15;23:132. doi: 10.1186/s12864-022-08380-4 (PMC8845233; doi:10.1186/s12864-022-08380-4)
Supplement: Supplementary file 3 — Additional file 3: Table S1. Information of infection stage-specifically expressed lncRNAs. [file 12864_2022_8380_MOESM3_ESM.xlsx]

## Sheet: Sheet1
Table S1. Information of infection stage-specifically expressed lncRNAs
LncRNA ID	Specific stage	Chromsome	Strand	Start position	End position
MSTRG.1.1	Biotrophic stage	1	+	24	701
MSTRG.5.1	Biotrophic stage	1	+	6528	7728
MSTRG.50.1	Biotrophic stage	1	-	141852	144076
MSTRG.58.1	Biotrophic stage	1	-	158918	159198
MSTRG.58.2	Biotrophic stage	1	-	158918	159198
MSTRG.73.3	Necrotrophic stage	1	-	197198	198674
MSTRG.126.3	Pre-penetration stage	1	-	353781	355255
MSTRG.153.2	Pre-penetration stage	1	+	419514	420847
MSTRG.264.1	Necrotrophic stage	1	-	707978	708690
MSTRG.264.2	Necrotrophic stage	1	-	708140	708690
MSTRG.289.1	Necrotrophic stage	1	-	791622	792227
MSTRG.296.1	Necrotrophic stage	1	-	811710	812639
MSTRG.296.3	Necrotrophic stage	1	-	811710	813134
MSTRG.349.1	Biotrophic stage	1	+	992544	993108
MSTRG.427.1	Pre-penetration stage	1	-	1276741	1277315
MSTRG.459.2	Necrotrophic stage	1	+	1360643	1361959
MSTRG.542.1	Biotrophic stage	1	-	1636128	1636807
MSTRG.551.1	Biotrophic stage	1	-	1661702	1662356
MSTRG.603.2	Biotrophic stage	1	+	1795828	1796200
MSTRG.614.1	Necrotrophic stage	1	+	1827790	1828387
MSTRG.657.1	Pre-penetration stage	1	-	1922906	1923399
MSTRG.693.2	Biotrophic stage	1	-	2009603	2012277
MSTRG.724.1	Necrotrophic stage	1	-	2088413	2093654
MSTRG.724.8	Biotrophic stage	1	-	2088792	2093654
MSTRG.724.7	Biotrophic stage	1	-	2088792	2093654
MSTRG.724.10	Necrotrophic stage	1	-	2089948	2093654
MSTRG.724.12	Biotrophic stage	1	-	2089971	2093694
MSTRG.724.11	Biotrophic stage	1	-	2089971	2091561
MSTRG.800.1	Biotrophic stage	1	-	2254279	2254660
MSTRG.817.1	Necrotrophic stage	1	+	2303631	2304001
MSTRG.832.2	Biotrophic stage	1	-	2330894	2331576
MSTRG.928.1	Pre-penetration stage	1	-	2575212	2575459
MSTRG.967.3	Biotrophic stage	1	-	2666889	2667387
MSTRG.969.4	Biotrophic stage	1	+	2673586	2676488
MSTRG.969.2	Biotrophic stage	1	+	2673586	2676488
MSTRG.1023.1	Necrotrophic stage	1	-	2849277	2849726
MSTRG.1024.1	Necrotrophic stage	1	+	2849277	2851946
MSTRG.1027.1	Necrotrophic stage	1	-	2855170	2870643
MSTRG.1029.1	Necrotrophic stage	1	+	2870184	2870760
MSTRG.1066.2	Pre-penetration stage	1	+	2962909	2964226
MSTRG.1096.1	Biotrophic stage	1	-	3031082	3031512
MSTRG.1097.1	Pre-penetration stage	1	-	3033005	3036277
MSTRG.1115.1	Necrotrophic stage	1	+	3089974	3090341
MSTRG.1136.1	Necrotrophic stage	1	-	3150893	3155439
MSTRG.1176.1	Necrotrophic stage	1	+	3246644	3247137
MSTRG.1225.1	Necrotrophic stage	1	+	3356117	3356576
MSTRG.1397.2	Biotrophic stage	1	-	3824543	3827156
MSTRG.1408.2	Biotrophic stage	1	-	3860344	3862409
MSTRG.1574.5	Necrotrophic stage	1	+	4289589	4293054
MSTRG.1581.3	Biotrophic stage	1	+	4305686	4306749
MSTRG.1597.1	Biotrophic stage	1	+	4345211	4351140
MSTRG.1601.1	Biotrophic stage	1	-	4355374	4355901
MSTRG.1613.3	Pre-penetration stage	1	+	4388672	4392364
MSTRG.1613.7	Necrotrophic stage	1	+	4388686	4392348
MSTRG.1631.1	Biotrophic stage	1	-	4456174	4462961
MSTRG.1631.3	Necrotrophic stage	1	-	4456741	4462965
MSTRG.1693.2	Biotrophic stage	1	-	4624768	4627741
MSTRG.1779.3	Biotrophic stage	1	-	4878667	4879892
MSTRG.1826.1	Biotrophic stage	1	+	5005272	5005848
MSTRG.1851.1	Necrotrophic stage	1	+	5074641	5075027
MSTRG.1851.2	Necrotrophic stage	1	+	5074641	5075027
MSTRG.1858.1	Biotrophic stage	1	-	5098090	5099378
MSTRG.1867.1	Necrotrophic stage	1	-	5115896	5116350
MSTRG.1867.2	Necrotrophic stage	1	-	5115896	5116350
MSTRG.1919.2	Pre-penetration stage	1	-	5263354	5268551
MSTRG.1930.1	Necrotrophic stage	1	-	5281270	5281587
MSTRG.1930.3	Necrotrophic stage	1	-	5281270	5281587
MSTRG.1943.1	Necrotrophic stage	1	-	5317824	5318047
MSTRG.1970.1	Biotrophic stage	1	-	5407996	5408844
MSTRG.1984.2	Biotrophic stage	1	-	5442283	5444247
MSTRG.1984.1	Biotrophic stage	1	-	5442283	5444253
MSTRG.1984.5	Biotrophic stage	1	-	5442825	5444230
MSTRG.2045.1	Necrotrophic stage	1	+	5571904	5572316
MSTRG.2057.2	Pre-penetration stage	1	-	5618513	5619414
MSTRG.2077.2	Pre-penetration stage	1	-	5679650	5680455
MSTRG.2136.4	Pre-penetration stage	1	+	5848637	5850583
MSTRG.2148.1	Biotrophic stage	1	-	5872501	5876676
MSTRG.2158.1	Biotrophic stage	1	-	5899743	5900151
MSTRG.2185.1	Biotrophic stage	1	-	5960689	5960935
MSTRG.2186.1	Pre-penetration stage	1	-	5962301	5963275
MSTRG.2215.1	Pre-penetration stage	1	+	6028242	6028552
MSTRG.2243.3	Necrotrophic stage	1	+	6115057	6117682
MSTRG.2295.1	Biotrophic stage	1	-	6244793	6248446
MSTRG.2304.1	Biotrophic stage	1	-	6270844	6273819
MSTRG.2304.2	Biotrophic stage	1	-	6270858	6271915
MSTRG.2338.1	Biotrophic stage	1	-	6367648	6367952
MSTRG.2369.2	Biotrophic stage	1	-	6443413	6448697
MSTRG.2392.1	Necrotrophic stage	1	+	6521343	6521843
MSTRG.2425.1	Necrotrophic stage	1	-	6619915	6622743
MSTRG.2429.5	Necrotrophic stage	1	-	6633372	6634618
MSTRG.2437.1	Necrotrophic stage	1	-	6655540	6658129
MSTRG.2438.1	Necrotrophic stage	1	-	6658237	6659477
MSTRG.2444.2	Necrotrophic stage	1	-	6685375	6688290
MSTRG.2504.2	Biotrophic stage	1	+	6865260	6868782
MSTRG.2504.1	Biotrophic stage	1	+	6865260	6868781
MSTRG.2504.4	Biotrophic stage	1	+	6865424	6868667
MSTRG.2504.6	Pre-penetration stage	1	+	6865524	6868781
MSTRG.2537.2	Pre-penetration stage	1	+	6944762	6946366
MSTRG.2557.1	Necrotrophic stage	1	-	6996580	6996887
MSTRG.2600.2	Necrotrophic stage	1	+	7113358	7113755
MSTRG.2673.1	Biotrophic stage	1	+	7297620	7297820
MSTRG.2767.3	Pre-penetration stage	1	-	7584419	7585269
MSTRG.2805.2	Biotrophic stage	1	-	7671208	7671774
MSTRG.2817.2	Necrotrophic stage	1	-	7695841	7697001
MSTRG.2819.1	Necrotrophic stage	1	+	7697597	7700990
MSTRG.2819.3	Necrotrophic stage	1	+	7697987	7700475
MSTRG.2819.4	Pre-penetration stage	1	+	7698023	7701027
MSTRG.2819.6	Necrotrophic stage	1	+	7698129	7701049
MSTRG.2824.1	Necrotrophic stage	1	-	7702491	7702734
MSTRG.2830.2	Necrotrophic stage	1	-	7716334	7718818
MSTRG.2848.1	Necrotrophic stage	1	+	7768169	7769800
MSTRG.2848.2	Necrotrophic stage	1	+	7768169	7769800
MSTRG.2850.1	Biotrophic stage	1	-	7779184	7781043
MSTRG.2850.5	Necrotrophic stage	1	-	7779355	7781043
MSTRG.2864.1	Necrotrophic stage	1	-	7817510	7817812
MSTRG.2882.1	Necrotrophic stage	1	+	7860300	7861140
MSTRG.2904.1	Necrotrophic stage	1	-	7927210	7933861
MSTRG.2918.1	Necrotrophic stage	2	+	11675	12220
MSTRG.2925.2	Necrotrophic stage	2	+	43761	44462
MSTRG.2928.1	Necrotrophic stage	2	-	49191	49514
MSTRG.2967.1	Necrotrophic stage	2	-	160206	160485
MSTRG.2989.1	Necrotrophic stage	2	+	209602	209922
MSTRG.3011.1	Necrotrophic stage	2	+	273020	273278
MSTRG.3017.1	Necrotrophic stage	2	-	288630	289083
MSTRG.3023.1	Necrotrophic stage	2	+	300592	301060
MSTRG.3118.4	Biotrophic stage	2	-	580378	581427
MSTRG.3135.1	Biotrophic stage	2	+	613576	613934
MSTRG.3174.1	Pre-penetration stage	2	-	738919	739387
MSTRG.3182.3	Necrotrophic stage	2	+	754209	754798
MSTRG.3190.1	Biotrophic stage	2	+	770700	771189
MSTRG.3195.3	Necrotrophic stage	2	-	779949	782574
MSTRG.3197.1	Biotrophic stage	2	-	787678	788073
MSTRG.3288.1	Pre-penetration stage	2	-	1006940	1007371
MSTRG.3365.3	Biotrophic stage	2	+	1232006	1232985
MSTRG.3405.3	Biotrophic stage	2	-	1330519	1332555
MSTRG.3558.2	Biotrophic stage	2	+	1703953	1706997
MSTRG.3571.1	Biotrophic stage	2	-	1733298	1733776
MSTRG.3652.1	Biotrophic stage	2	-	1910549	1911082
MSTRG.3652.3	Biotrophic stage	2	-	1910556	1911107
MSTRG.3682.1	Necrotrophic stage	2	-	2000298	2000550
MSTRG.3683.2	Pre-penetration stage	2	-	2003528	2004900
MSTRG.3684.2	Pre-penetration stage	2	+	2004932	2008168
MSTRG.3729.1	Biotrophic stage	2	+	2127683	2128194
MSTRG.3737.1	Necrotrophic stage	2	-	2141295	2147993
MSTRG.3737.4	Necrotrophic stage	2	-	2142579	2147993
MSTRG.3844.2	Necrotrophic stage	2	-	2471588	2475893
MSTRG.3844.4	Biotrophic stage	2	-	2472138	2474463
MSTRG.3910.2	Biotrophic stage	2	-	2638658	2639738
MSTRG.4035.1	Biotrophic stage	2	+	2982046	2988603
MSTRG.4112.5	Necrotrophic stage	2	+	3200573	3202440
MSTRG.4142.1	Necrotrophic stage	2	+	3286162	3286415
MSTRG.4152.1	Biotrophic stage	2	-	3311735	3312360
MSTRG.4225.1	Biotrophic stage	2	-	3478010	3479250
MSTRG.4245.1	Biotrophic stage	2	-	3529271	3529635
MSTRG.4246.3	Biotrophic stage	2	-	3534596	3535013
MSTRG.4252.1	Necrotrophic stage	2	-	3547133	3547641
MSTRG.4253.1	Biotrophic stage	2	+	3550157	3550509
MSTRG.4289.2	Pre-penetration stage	2	-	3674465	3677378
MSTRG.4312.2	Biotrophic stage	2	-	3742257	3742833
MSTRG.4325.1	Biotrophic stage	2	+	3781058	3781374
MSTRG.4426.2	Necrotrophic stage	2	-	4059067	4061046
MSTRG.4456.1	Necrotrophic stage	2	-	4120618	4120872
MSTRG.4487.1	Necrotrophic stage	2	-	4194875	4197606
MSTRG.4487.3	Necrotrophic stage	2	-	4194987	4197606
MSTRG.4487.2	Necrotrophic stage	2	-	4194987	4197606
MSTRG.4602.3	Necrotrophic stage	2	+	4522273	4524836
MSTRG.4654.1	Biotrophic stage	2	+	4677419	4677857
MSTRG.4663.1	Biotrophic stage	2	-	4702373	4702718
MSTRG.4678.5	Necrotrophic stage	2	-	4735265	4739574
MSTRG.4705.1	Necrotrophic stage	2	+	4812606	4812819
MSTRG.4721.2	Biotrophic stage	2	-	4840340	4840810
MSTRG.4732.2	Biotrophic stage	2	-	4870641	4873043
MSTRG.4732.7	Necrotrophic stage	2	-	4870691	4872980
MSTRG.4759.1	Biotrophic stage	2	+	4948011	4948242
MSTRG.4790.4	Biotrophic stage	2	+	5029645	5030930
MSTRG.4824.2	Biotrophic stage	2	-	5129983	5130514
MSTRG.4830.1	Biotrophic stage	2	-	5139839	5140404
MSTRG.4855.1	Biotrophic stage	2	+	5199508	5199844
MSTRG.4902.2	Necrotrophic stage	2	+	5320411	5324480
MSTRG.5021.1	Biotrophic stage	2	+	5627469	5628044
MSTRG.5031.1	Biotrophic stage	2	+	5664587	5664859
MSTRG.5058.1	Biotrophic stage	2	-	5727001	5727231
MSTRG.5112.2	Biotrophic stage	2	-	5850375	5861137
MSTRG.5112.3	Necrotrophic stage	2	-	5850386	5861260
MSTRG.5117.1	Biotrophic stage	2	-	5862837	5863192
MSTRG.5135.1	Biotrophic stage	2	-	5901666	5902028
MSTRG.5151.2	Biotrophic stage	2	-	5943810	5944842
MSTRG.5162.1	Biotrophic stage	2	+	5970341	5970813
MSTRG.5169.1	Biotrophic stage	2	-	5982875	5985921
MSTRG.5177.1	Necrotrophic stage	2	+	6009304	6009815
MSTRG.5209.1	Biotrophic stage	2	+	6074410	6074703
MSTRG.5235.2	Biotrophic stage	2	+	6146586	6150888
MSTRG.5235.3	Biotrophic stage	2	+	6146636	6150888
MSTRG.5235.4	Necrotrophic stage	2	+	6146636	6150696
MSTRG.5262.1	Biotrophic stage	2	-	6212142	6212538
MSTRG.5355.1	Biotrophic stage	2	-	6448585	6448964
MSTRG.5378.1	Biotrophic stage	2	+	6505945	6507225
MSTRG.5486.3	Biotrophic stage	2	+	6756772	6761591
MSTRG.5489.4	Pre-penetration stage	2	-	6772423	6776639
MSTRG.5499.1	Biotrophic stage	2	+	6794831	6795822
MSTRG.5528.1	Biotrophic stage	2	+	6877362	6878051
MSTRG.5531.2	Pre-penetration stage	2	+	6883711	6883974
MSTRG.5537.1	Biotrophic stage	2	-	6905481	6905753
MSTRG.5546.1	Biotrophic stage	2	-	6926345	6926668
MSTRG.5580.1	Biotrophic stage	2	-	7016471	7016768
MSTRG.5658.4	Biotrophic stage	2	-	7229198	7229958
MSTRG.5701.1	Biotrophic stage	2	-	7336105	7337309
MSTRG.5720.1	Necrotrophic stage	2	+	7397465	7398057
MSTRG.5896.1	Biotrophic stage	2	+	7896304	7896573
MSTRG.5916.1	Biotrophic stage	2	+	7947592	7951969
MSTRG.5916.3	Biotrophic stage	2	+	7948360	7951573
MSTRG.5923.2	Biotrophic stage	2	-	7965268	7966250
MSTRG.5926.3	Necrotrophic stage	2	+	7973509	7978821
MSTRG.5962.2	Necrotrophic stage	2	+	8065218	8065747
MSTRG.6021.2	Necrotrophic stage	2	+	8222461	8223017
MSTRG.6027.1	Necrotrophic stage	2	+	8258514	8263187
MSTRG.6026.4	Necrotrophic stage	2	-	8260767	8262563
MSTRG.6040.1	Necrotrophic stage	2	+	8293165	8293606
MSTRG.6043.1	Necrotrophic stage	2	+	8295616	8297678
MSTRG.6070.1	Biotrophic stage	3	+	81336	81623
MSTRG.6124.2	Biotrophic stage	3	+	231153	231663
MSTRG.6147.1	Necrotrophic stage	3	-	346510	347520
MSTRG.6215.1	Biotrophic stage	3	-	549508	550591
MSTRG.6228.1	Necrotrophic stage	3	-	585955	592962
MSTRG.6229.2	Necrotrophic stage	3	+	593033	598164
MSTRG.6229.4	Biotrophic stage	3	+	593155	599119
MSTRG.6229.5	Pre-penetration stage	3	+	594985	597655
MSTRG.6232.1	Biotrophic stage	3	-	603491	603891
MSTRG.6456.1	Necrotrophic stage	3	+	1128060	1128464
MSTRG.6481.2	Necrotrophic stage	3	-	1198617	1200867
MSTRG.6487.1	Biotrophic stage	3	-	1214578	1222350
MSTRG.6488.1	Biotrophic stage	3	+	1215509	1215961
MSTRG.6508.3	Pre-penetration stage	3	+	1260963	1264731
MSTRG.6511.1	Necrotrophic stage	3	+	1266747	1269924
MSTRG.6511.2	Necrotrophic stage	3	+	1266747	1269924
MSTRG.6522.1	Necrotrophic stage	3	+	1292224	1297259
MSTRG.6543.3	Biotrophic stage	3	+	1376168	1379598
MSTRG.6620.1	Biotrophic stage	3	+	1624965	1625197
MSTRG.6702.1	Pre-penetration stage	3	-	1902087	1902490
MSTRG.6733.3	Biotrophic stage	3	+	1980251	1980998
MSTRG.6841.5	Necrotrophic stage	3	-	2272319	2274664
MSTRG.6841.6	Necrotrophic stage	3	-	2272319	2274664
MSTRG.6841.8	Necrotrophic stage	3	-	2272319	2274664
MSTRG.6841.9	Necrotrophic stage	3	-	2272320	2274539
MSTRG.6841.10	Necrotrophic stage	3	-	2272320	2274539
MSTRG.6845.1	Necrotrophic stage	3	+	2277937	2281258
MSTRG.6847.1	Biotrophic stage	3	-	2282429	2284059
MSTRG.7029.2	Necrotrophic stage	3	-	2752320	2753294
MSTRG.7029.3	Necrotrophic stage	3	-	2752345	2753780
MSTRG.7052.2	Necrotrophic stage	3	+	2826223	2827791
MSTRG.7052.3	Pre-penetration stage	3	+	2826449	2827812
MSTRG.7082.2	Necrotrophic stage	3	+	2891239	2896317
MSTRG.7194.2	Pre-penetration stage	3	+	3231658	3237706
MSTRG.7274.1	Pre-penetration stage	3	+	3443482	3443744
MSTRG.7361.1	Biotrophic stage	3	+	3631661	3632306
MSTRG.7375.2	Biotrophic stage	3	-	3683691	3684883
MSTRG.7417.2	Biotrophic stage	3	+	3792774	3795696
MSTRG.7482.1	Biotrophic stage	3	-	3976862	3977299
MSTRG.7485.1	Pre-penetration stage	3	-	3980466	3980736
MSTRG.7494.2	Pre-penetration stage	3	-	3993893	3995558
MSTRG.7552.6	Necrotrophic stage	3	-	4132949	4136720
MSTRG.7552.7	Necrotrophic stage	3	-	4132949	4136720
MSTRG.7598.3	Necrotrophic stage	3	+	4288172	4293406
MSTRG.7601.1	Necrotrophic stage	3	-	4296206	4296594
MSTRG.7638.1	Biotrophic stage	3	-	4403505	4404133
MSTRG.7640.1	Biotrophic stage	3	-	4404838	4405337
MSTRG.7640.2	Biotrophic stage	3	-	4404931	4405322
MSTRG.7659.3	Biotrophic stage	3	-	4460185	4463590
MSTRG.7677.2	Biotrophic stage	3	-	4502541	4504249
MSTRG.7680.1	Biotrophic stage	3	+	4507616	4509397
MSTRG.7740.4	Pre-penetration stage	3	-	4649509	4651985
MSTRG.7745.1	Necrotrophic stage	3	-	4661611	4661872
MSTRG.7768.3	Biotrophic stage	3	+	4711328	4712635
MSTRG.7894.3	Necrotrophic stage	3	+	5022706	5024549
MSTRG.7908.2	Necrotrophic stage	3	+	5056602	5059013
MSTRG.8040.1	Biotrophic stage	3	+	5410526	5410762
MSTRG.8205.2	Necrotrophic stage	3	+	5855358	5856333
MSTRG.8205.1	Necrotrophic stage	3	+	5855358	5856333
MSTRG.8235.1	Necrotrophic stage	3	+	5943188	5943635
MSTRG.8235.2	Necrotrophic stage	3	+	5943188	5943635
MSTRG.8247.5	Biotrophic stage	3	+	5967720	5968311
MSTRG.8259.3	Biotrophic stage	3	+	6001515	6005454
MSTRG.8320.1	Biotrophic stage	3	+	6176434	6179158
MSTRG.8347.2	Necrotrophic stage	3	-	6267401	6268054
MSTRG.8350.1	Necrotrophic stage	3	-	6274926	6275820
MSTRG.8378.1	Necrotrophic stage	3	-	6357975	6358317
MSTRG.8380.2	Necrotrophic stage	3	+	6361776	6362411
MSTRG.8389.1	Necrotrophic stage	3	-	6379563	6379821
MSTRG.8407.2	Necrotrophic stage	3	-	6419901	6422664
MSTRG.8410.1	Necrotrophic stage	3	-	6424226	6424486
MSTRG.8479.1	Necrotrophic stage	4	+	104420	105153
MSTRG.8552.1	Biotrophic stage	4	+	316599	317018
MSTRG.8556.1	Necrotrophic stage	4	-	325147	332132
MSTRG.8578.1	Necrotrophic stage	4	-	380684	381200
MSTRG.8580.1	Necrotrophic stage	4	-	388798	389076
MSTRG.8581.1	Necrotrophic stage	4	-	389404	389696
MSTRG.8607.1	Necrotrophic stage	4	-	448611	449055
MSTRG.8618.1	Necrotrophic stage	4	+	487497	488270
MSTRG.8648.1	Necrotrophic stage	4	+	569358	571138
MSTRG.8648.2	Necrotrophic stage	4	+	569358	571138
MSTRG.8654.1	Necrotrophic stage	4	-	583871	584684
MSTRG.8655.1	Necrotrophic stage	4	+	584896	594735
MSTRG.8655.2	Necrotrophic stage	4	+	585670	594735
MSTRG.8701.2	Pre-penetration stage	4	-	702981	704412
MSTRG.8758.1	Biotrophic stage	4	-	852439	853055
MSTRG.8824.1	Biotrophic stage	4	-	1013023	1014673
MSTRG.8835.2	Biotrophic stage	4	+	1035368	1035827
MSTRG.8885.1	Pre-penetration stage	4	-	1160670	1161178
MSTRG.8886.5	Biotrophic stage	4	-	1161975	1167367
MSTRG.8913.3	Necrotrophic stage	4	-	1225566	1226653
MSTRG.8949.1	Biotrophic stage	4	+	1322572	1322780
MSTRG.8963.1	Necrotrophic stage	4	+	1351452	1351735
MSTRG.8983.1	Necrotrophic stage	4	-	1400959	1402419
MSTRG.9036.2	Necrotrophic stage	4	-	1539265	1540247
MSTRG.9049.1	Biotrophic stage	4	-	1578791	1580476
MSTRG.9063.2	Pre-penetration stage	4	+	1620506	1621221
MSTRG.9106.1	Biotrophic stage	4	+	1733201	1733659
MSTRG.9189.1	Necrotrophic stage	4	+	1934628	1935016
MSTRG.9200.2	Necrotrophic stage	4	+	1960439	1962355
MSTRG.9206.1	Biotrophic stage	4	-	1979511	1979791
MSTRG.9236.1	Biotrophic stage	4	+	2065382	2067091
MSTRG.9273.7	Biotrophic stage	4	-	2159474	2163671
MSTRG.9273.3	Necrotrophic stage	4	-	2159474	2163593
MSTRG.9297.1	Necrotrophic stage	4	-	2206738	2207052
MSTRG.9314.2	Necrotrophic stage	4	+	2248577	2248927
MSTRG.9426.2	Pre-penetration stage	4	+	2562459	2563421
MSTRG.9426.3	Biotrophic stage	4	+	2562459	2563373
MSTRG.9444.1	Pre-penetration stage	4	+	2607167	2607422
MSTRG.9445.2	Pre-penetration stage	4	+	2608447	2609337
MSTRG.9475.3	Biotrophic stage	4	+	2690257	2695644
MSTRG.9475.4	Necrotrophic stage	4	+	2693819	2695644
MSTRG.9571.1	Necrotrophic stage	4	+	2932677	2933171
MSTRG.9578.5	Necrotrophic stage	4	-	2948772	2951662
MSTRG.9693.1	Necrotrophic stage	4	+	3225206	3225810
MSTRG.9713.2	Biotrophic stage	4	-	3272333	3273741
MSTRG.9748.1	Biotrophic stage	4	+	3355212	3355733
MSTRG.9757.1	Necrotrophic stage	4	-	3376040	3380774
MSTRG.9757.2	Necrotrophic stage	4	-	3376045	3380582
MSTRG.9757.3	Pre-penetration stage	4	-	3376333	3380570
MSTRG.9801.2	Pre-penetration stage	4	-	3475777	3478262
MSTRG.9801.4	Biotrophic stage	4	-	3475799	3479540
MSTRG.9826.4	Necrotrophic stage	4	+	3539753	3543303
MSTRG.9841.2	Biotrophic stage	4	+	3572602	3573990
MSTRG.9894.1	Biotrophic stage	4	-	3707881	3708681
MSTRG.9938.1	Pre-penetration stage	4	+	3831114	3831423
MSTRG.10019.4	Necrotrophic stage	4	-	4045764	4047031
MSTRG.10045.1	Pre-penetration stage	4	+	4104917	4105449
MSTRG.10069.1	Biotrophic stage	4	+	4154535	4155768
MSTRG.10214.1	Biotrophic stage	4	+	4539392	4539783
MSTRG.10214.2	Biotrophic stage	4	+	4539398	4539783
MSTRG.10238.1	Biotrophic stage	4	-	4636165	4637779
MSTRG.10249.2	Necrotrophic stage	4	-	4657454	4658139
MSTRG.10249.3	Necrotrophic stage	4	-	4657756	4658165
MSTRG.10295.1	Biotrophic stage	4	+	4795860	4796207
MSTRG.10347.1	Necrotrophic stage	4	-	4955603	4956054
MSTRG.10383.1	Necrotrophic stage	4	+	5055161	5055480
MSTRG.10397.2	Pre-penetration stage	4	-	5113263	5114011
MSTRG.10397.1	Biotrophic stage	4	-	5113263	5114150
MSTRG.10442.1	Biotrophic stage	4	+	5252945	5253322
MSTRG.10474.1	Biotrophic stage	4	+	5323450	5333743
MSTRG.10491.3	Pre-penetration stage	4	+	5365220	5371814
MSTRG.10491.4	Biotrophic stage	4	+	5365220	5371814
MSTRG.10491.1	Biotrophic stage	4	+	5365220	5371814
MSTRG.10520.3	Biotrophic stage	4	+	5440621	5443038
MSTRG.10529.2	Biotrophic stage	4	-	5457050	5457781
MSTRG.10573.1	Necrotrophic stage	5	+	52564	53305
MSTRG.10577.1	Necrotrophic stage	5	-	59705	60241
MSTRG.10580.1	Necrotrophic stage	5	+	66103	66650
MSTRG.10598.1	Necrotrophic stage	5	+	104468	104764
MSTRG.10602.1	Necrotrophic stage	5	-	146468	146681
MSTRG.10659.1	Necrotrophic stage	5	-	309768	310151
MSTRG.10682.2	Biotrophic stage	5	+	366951	368044
MSTRG.10685.2	Necrotrophic stage	5	+	372319	373845
MSTRG.10756.3	Biotrophic stage	5	-	555844	557860
MSTRG.10756.2	Necrotrophic stage	5	-	555844	557735
MSTRG.10756.4	Necrotrophic stage	5	-	555844	557735
MSTRG.10756.8	Pre-penetration stage	5	-	556434	557735
MSTRG.10756.9	Biotrophic stage	5	-	556434	557735
MSTRG.10756.10	Biotrophic stage	5	-	556440	557860
MSTRG.10815.4	Pre-penetration stage	5	-	703512	704577
MSTRG.10849.1	Pre-penetration stage	5	-	831802	832057
MSTRG.10850.3	Biotrophic stage	5	-	834467	835491
MSTRG.10854.1	Necrotrophic stage	5	+	844331	844794
MSTRG.10882.1	Biotrophic stage	5	+	900366	900837
MSTRG.10916.1	Necrotrophic stage	5	-	974385	974821
MSTRG.10986.1	Pre-penetration stage	5	-	1133972	1134249
MSTRG.10993.3	Necrotrophic stage	5	+	1149953	1151166
MSTRG.11014.1	Biotrophic stage	5	+	1192935	1203739
MSTRG.11041.2	Biotrophic stage	5	-	1267059	1267397
MSTRG.11081.3	Biotrophic stage	5	-	1367888	1371490
MSTRG.11110.1	Biotrophic stage	5	-	1431295	1432004
MSTRG.11141.1	Biotrophic stage	5	+	1504485	1505769
MSTRG.11155.1	Necrotrophic stage	5	-	1545449	1546104
MSTRG.11207.3	Pre-penetration stage	5	-	1669913	1671499
MSTRG.11241.2	Necrotrophic stage	5	+	1752099	1754128
MSTRG.11340.3	Biotrophic stage	5	+	2001379	2001937
MSTRG.11360.2	Necrotrophic stage	5	-	2042416	2043462
MSTRG.11361.3	Biotrophic stage	5	+	2043632	2045845
MSTRG.11489.1	Biotrophic stage	5	+	2348422	2348705
MSTRG.11512.2	Biotrophic stage	5	-	2399702	2401067
MSTRG.11529.2	Necrotrophic stage	5	-	2440152	2444776
MSTRG.11729.5	Biotrophic stage	5	-	2913789	2919840
MSTRG.11764.1	Biotrophic stage	5	+	2998566	2998772
MSTRG.11826.1	Biotrophic stage	5	+	3137479	3137931
MSTRG.11855.1	Necrotrophic stage	5	-	3219353	3219661
MSTRG.11866.2	Biotrophic stage	5	+	3238858	3239136
MSTRG.11871.2	Biotrophic stage	5	-	3246314	3249440
MSTRG.11871.5	Biotrophic stage	5	-	3246314	3249440
MSTRG.11910.1	Necrotrophic stage	5	-	3346172	3346581
MSTRG.11920.4	Pre-penetration stage	5	-	3382303	3385084
MSTRG.11939.1	Necrotrophic stage	5	+	3434188	3438297
MSTRG.11965.1	Biotrophic stage	5	-	3499147	3499525
MSTRG.12022.2	Biotrophic stage	5	-	3692974	3694746
MSTRG.12037.2	Biotrophic stage	5	-	3736381	3736787
MSTRG.12059.3	Biotrophic stage	5	+	3807356	3810474
MSTRG.12059.2	Necrotrophic stage	5	+	3807356	3810483
MSTRG.12157.1	Biotrophic stage	5	-	4063992	4064264
MSTRG.12164.1	Biotrophic stage	5	+	4076520	4076733
MSTRG.12195.1	Pre-penetration stage	5	-	4164908	4167192
MSTRG.12216.2	Pre-penetration stage	5	-	4217700	4218731
MSTRG.12216.3	Pre-penetration stage	5	-	4217700	4218731
MSTRG.12253.1	Necrotrophic stage	5	-	4315105	4315319
MSTRG.12261.5	Necrotrophic stage	5	+	4340761	4347577
MSTRG.12265.1	Necrotrophic stage	5	-	4355017	4355444
MSTRG.12269.1	Biotrophic stage	5	-	4364890	4365522
MSTRG.12276.1	Necrotrophic stage	5	+	4395421	4395673
MSTRG.12277.1	Biotrophic stage	5	+	4399901	4400105
MSTRG.12282.1	Biotrophic stage	5	+	4416527	4417164
MSTRG.12293.1	Necrotrophic stage	5	-	4445235	4447872
MSTRG.12299.1	Necrotrophic stage	5	-	4465805	4471750
MSTRG.12299.2	Necrotrophic stage	5	-	4465805	4471750
MSTRG.12359.1	Necrotrophic stage	6	-	145188	145412
MSTRG.12492.4	Necrotrophic stage	6	+	504369	507163
MSTRG.12492.2	Necrotrophic stage	6	+	504369	507163
MSTRG.12492.3	Necrotrophic stage	6	+	504369	507163
MSTRG.12492.1	Necrotrophic stage	6	+	504369	507163
MSTRG.12514.1	Necrotrophic stage	6	+	574234	578374
MSTRG.12521.1	Necrotrophic stage	6	-	587694	588117
MSTRG.12569.1	Necrotrophic stage	6	-	738510	739777
MSTRG.12608.1	Necrotrophic stage	6	-	882873	883440
MSTRG.12613.1	Necrotrophic stage	6	+	911438	912038
MSTRG.12638.2	Biotrophic stage	6	+	988347	993356
MSTRG.12640.1	Biotrophic stage	6	-	992486	993040
MSTRG.12650.1	Biotrophic stage	6	+	1024316	1025141
MSTRG.12689.1	Biotrophic stage	6	+	1127532	1127913
MSTRG.12693.1	Pre-penetration stage	6	-	1137267	1138037
MSTRG.12720.1	Pre-penetration stage	6	-	1209957	1211843
MSTRG.12735.1	Biotrophic stage	6	-	1273518	1273781
MSTRG.12747.1	Necrotrophic stage	6	-	1298857	1299942
MSTRG.12757.1	Necrotrophic stage	6	+	1329326	1363062
MSTRG.12778.1	Necrotrophic stage	6	-	1377092	1377576
MSTRG.12783.1	Biotrophic stage	6	-	1391338	1391927
MSTRG.12810.2	Biotrophic stage	6	+	1445626	1448945
MSTRG.12854.1	Biotrophic stage	6	-	1588569	1589536
MSTRG.12859.1	Necrotrophic stage	6	-	1601153	1601839
MSTRG.12864.1	Biotrophic stage	6	-	1609104	1609859
MSTRG.12872.1	Necrotrophic stage	6	+	1620850	1621308
MSTRG.12961.1	Biotrophic stage	6	+	1879977	1880548
MSTRG.12992.1	Biotrophic stage	6	-	1957036	1957532
MSTRG.13134.2	Biotrophic stage	6	+	2296355	2297062
MSTRG.13164.3	Necrotrophic stage	6	+	2375671	2377332
MSTRG.13181.1	Pre-penetration stage	6	-	2417471	2420484
MSTRG.13216.3	Biotrophic stage	6	+	2517924	2520464
MSTRG.13233.3	Pre-penetration stage	6	-	2563769	2570075
MSTRG.13249.1	Necrotrophic stage	6	+	2605241	2607721
MSTRG.13283.1	Biotrophic stage	6	+	2682356	2683618
MSTRG.13287.1	Biotrophic stage	6	-	2692227	2692660
MSTRG.13291.2	Biotrophic stage	6	+	2696828	2697239
MSTRG.13292.1	Biotrophic stage	6	+	2698358	2698717
MSTRG.13303.1	Biotrophic stage	6	+	2726979	2727384
MSTRG.13313.2	Biotrophic stage	6	+	2749021	2750576
MSTRG.13321.2	Necrotrophic stage	6	+	2763477	2763797
MSTRG.13337.1	Biotrophic stage	6	-	2799777	2800553
MSTRG.13401.1	Necrotrophic stage	6	+	2979003	2979817
MSTRG.13427.1	Necrotrophic stage	6	+	3077934	3078426
MSTRG.13498.1	Necrotrophic stage	6	+	3315048	3315474
MSTRG.13647.1	Biotrophic stage	6	-	3696339	3698650
MSTRG.13647.2	Biotrophic stage	6	-	3696339	3698739
MSTRG.13647.4	Pre-penetration stage	6	-	3696528	3698739
MSTRG.13666.1	Necrotrophic stage	6	+	3746290	3746637
MSTRG.13692.2	Biotrophic stage	6	-	3816693	3818387
MSTRG.13692.3	Biotrophic stage	6	-	3817091	3818391
MSTRG.13706.2	Biotrophic stage	6	+	3847693	3851558
MSTRG.13724.1	Necrotrophic stage	6	+	3880476	3880791
MSTRG.13745.1	Pre-penetration stage	6	+	3929101	3929769
MSTRG.13758.1	Pre-penetration stage	6	+	3952517	3953596
MSTRG.13903.5	Pre-penetration stage	7	-	183826	186011
MSTRG.13903.7	Biotrophic stage	7	-	184185	185918
MSTRG.13915.1	Necrotrophic stage	7	+	212161	213276
MSTRG.13985.2	Pre-penetration stage	7	-	408199	412257
MSTRG.13994.1	Biotrophic stage	7	-	430985	431764
MSTRG.13997.1	Necrotrophic stage	7	+	434225	434466
MSTRG.13998.4	Necrotrophic stage	7	+	434949	435543
MSTRG.13998.5	Necrotrophic stage	7	+	434949	435543
MSTRG.13998.7	Necrotrophic stage	7	+	434953	435543
MSTRG.13998.6	Necrotrophic stage	7	+	434953	435543
MSTRG.14059.1	Biotrophic stage	7	-	602728	602941
MSTRG.14083.1	Biotrophic stage	7	-	657645	657937
MSTRG.14090.2	Biotrophic stage	7	-	665753	667294
MSTRG.14199.2	Pre-penetration stage	7	+	930004	932399
MSTRG.14206.1	Pre-penetration stage	7	-	946535	948714
MSTRG.14206.2	Biotrophic stage	7	-	946702	948685
MSTRG.14206.3	Biotrophic stage	7	-	946912	948667
MSTRG.14207.1	Biotrophic stage	7	+	947444	947956
MSTRG.14212.2	Necrotrophic stage	7	-	955946	962990
MSTRG.14226.1	Biotrophic stage	7	+	987567	988054
MSTRG.14248.2	Biotrophic stage	7	-	1032253	1033278
MSTRG.14256.2	Pre-penetration stage	7	+	1059147	1061091
MSTRG.14262.3	Biotrophic stage	7	-	1070728	1079469
MSTRG.14262.7	Necrotrophic stage	7	-	1073978	1079206
MSTRG.14270.3	Pre-penetration stage	7	-	1101301	1105817
MSTRG.14270.2	Necrotrophic stage	7	-	1101301	1105817
MSTRG.14270.1	Necrotrophic stage	7	-	1101301	1105817
MSTRG.14310.4	Necrotrophic stage	7	-	1210818	1214582
MSTRG.14354.1	Necrotrophic stage	7	-	1325661	1326663
MSTRG.14365.1	Biotrophic stage	7	+	1350548	1350964
MSTRG.14371.2	Pre-penetration stage	7	+	1367536	1374262
MSTRG.14400.2	Biotrophic stage	7	-	1435302	1436672
MSTRG.14400.3	Biotrophic stage	7	-	1435544	1436676
MSTRG.14402.2	Biotrophic stage	7	-	1439549	1440065
MSTRG.14411.2	Necrotrophic stage	7	-	1457263	1458538
MSTRG.14444.1	Biotrophic stage	7	-	1548168	1549370
MSTRG.14499.2	Biotrophic stage	7	-	1687597	1688450
MSTRG.14527.1	Biotrophic stage	7	-	1760294	1761470
MSTRG.14532.3	Necrotrophic stage	7	+	1775906	1776165
MSTRG.14532.2	Necrotrophic stage	7	+	1775906	1776165
MSTRG.14547.1	Biotrophic stage	7	+	1798566	1799030
MSTRG.14598.2	Necrotrophic stage	7	+	1930862	1935593
MSTRG.14634.1	Biotrophic stage	7	+	2027402	2029734
MSTRG.14634.3	Necrotrophic stage	7	+	2027402	2029840
MSTRG.14671.1	Necrotrophic stage	7	+	2110847	2111087
MSTRG.14729.1	Pre-penetration stage	7	+	2248985	2250002
MSTRG.14729.2	Biotrophic stage	7	+	2249127	2250032
MSTRG.14729.3	Biotrophic stage	7	+	2249246	2250075
MSTRG.14841.2	Necrotrophic stage	7	-	2573589	2576840
MSTRG.14853.1	Necrotrophic stage	7	+	2626615	2626963
MSTRG.14855.1	Necrotrophic stage	7	+	2628211	2629545
MSTRG.14912.1	Pre-penetration stage	7	-	2763055	2763512
MSTRG.14912.3	Biotrophic stage	7	-	2763143	2763471
MSTRG.14913.1	Pre-penetration stage	7	+	2763761	2764041
MSTRG.14942.1	Biotrophic stage	7	+	2830558	2830994
MSTRG.14974.1	Necrotrophic stage	7	+	2932460	2936638
MSTRG.14975.2	Necrotrophic stage	7	-	2936334	2936638
MSTRG.14975.1	Necrotrophic stage	7	-	2936334	2936638
MSTRG.14980.1	Necrotrophic stage	7	-	2949318	2949861
MSTRG.14984.1	Necrotrophic stage	7	+	2964095	2964379
MSTRG.14985.1	Necrotrophic stage	7	-	2969659	2970132
MSTRG.15032.1	Necrotrophic stage	7	+	3149594	3150848
MSTRG.15044.1	Necrotrophic stage	7	+	3210224	3210608
MSTRG.15097.1	Necrotrophic stage	7	-	3381046	3381774
MSTRG.15098.1	Necrotrophic stage	7	+	3382000	3382567
MSTRG.15100.1	Necrotrophic stage	7	+	3382893	3383220
MSTRG.15121.1	Biotrophic stage	8	+	44278	45278
MSTRG.15132.1	Necrotrophic stage	8	+	75720	76157
MSTRG.15136.1	Necrotrophic stage	8	+	86106	86475
MSTRG.15158.1	Biotrophic stage	8	+	130386	130752
MSTRG.15159.4	Biotrophic stage	8	+	131204	134938
MSTRG.15159.3	Necrotrophic stage	8	+	131204	134938
MSTRG.15225.1	Necrotrophic stage	8	-	335465	336298
MSTRG.15230.1	Necrotrophic stage	8	+	349862	350468
