# Supplementary material for: Genome-wide profiling of long non-coding RNA of the rice blast fungus Magnaporthe oryzae during infection
Source: BMC Genomics. 2022 Feb 15;23:132. doi: 10.1186/s12864-022-08380-4 (PMC8845233; doi:10.1186/s12864-022-08380-4)
Supplement: Supplementary file 4 — Additional file 4: Table S2. Enriched GO terms of infection stage-specifically expressed lncRNA target genes. [file 12864_2022_8380_MOESM4_ESM.xlsx]

## Sheet: Sheet1
Table S2. Enriched GO terms of infection stage-specifically expressed lncRNA target genes
GO ID	Category	Description	Number of genes	False discovery rate	Source
GO:0030248	Molecular function	cellulose binding	9	1.23e-05	Blast2GO
GO:0030247	Molecular function	polysaccharide binding	9	1.23e-05	Blast2GO
GO:0016798	Molecular function	hydrolase activity, acting on glycosyl bonds	23	1.23e-05	Blast2GO
GO:0004553	Molecular function	hydrolase activity, hydrolyzing O-glycosyl compounds	23	1.23e-05	Blast2GO
GO:0051701	Biological process	interaction with host	14	0.0001	AgriGO
GO:0052047	Biological process	interaction with other organism via secreted substance during symbiotic interaction	12	0.00016	AgriGO
GO:0044046	Biological process	interaction with host via substance released outside of symbiont	12	0.00016	AgriGO
GO:0052048	Biological process	interaction with host via secreted substance during symbiotic interaction	12	0.00016	AgriGO
GO:0052051	Biological process	interaction with host via protein secreted by type II secretion system	11	0.00052	AgriGO
GO:0052211	Biological process	interaction with other organism via protein secreted by type II secretion system during symbiotic interaction	11	0.00052	AgriGO
GO:0030246	Molecular function	carbohydrate binding	11	0.00062	Blast2GO
GO:0005975	Biological process	carbohydrate metabolic process	24	0.0012	Blast2GO
GO:0051704	Biological process	multi-organism process	16	0.005	AgriGO
GO:0044419	Biological process	interspecies interaction between organisms	14	0.028	AgriGO
GO:0044403	Biological process	symbiosis, encompassing mutualism through parasitism	14	0.028	AgriGO
