# Supplementary material for: Genome-wide profiling of long non-coding RNA of the rice blast fungus Magnaporthe oryzae during infection
Source: BMC Genomics. 2022 Feb 15;23:132. doi: 10.1186/s12864-022-08380-4 (PMC8845233; doi:10.1186/s12864-022-08380-4)
Supplement: Supplementary file 5 — Additional file 5: Table S3. Enriched GO terms of mycelia-specifically expressed lncRNA target genes. [file 12864_2022_8380_MOESM5_ESM.xlsx]

## Sheet: Sheet1
Table S3. Enriched GO terms of mycelia-specifically expressed lncRNA target genes
GO ID	Category	Description	Number of genes	False discovery rate	Source
GO:0005488	Molecular function	binding	127	1.82714e-09	Blast2GO
GO:0007275	Biological process	multicellular organismal development	67	2.8e-10	AgriGO
GO:0043581	Biological process	mycelium development	67	2.8e-10	AgriGO
GO:0032502	Biological process	developmental process	72	2.8e-10	AgriGO
GO:0032501	Biological process	multicellular organismal process	67	2.8e-10	AgriGO
GO:0048856	Biological process	anatomical structure development	70	2.8e-10	AgriGO
